# Supplementary material for: Single-Cell Transcriptome Analysis Reveals RGS1 as a New Marker and Promoting Factor for T-Cell Exhaustion in Multiple Cancers
Source: Frontiers journal article supplement (doi:10.3389/fimmu.2021.767070), 2021-12-08

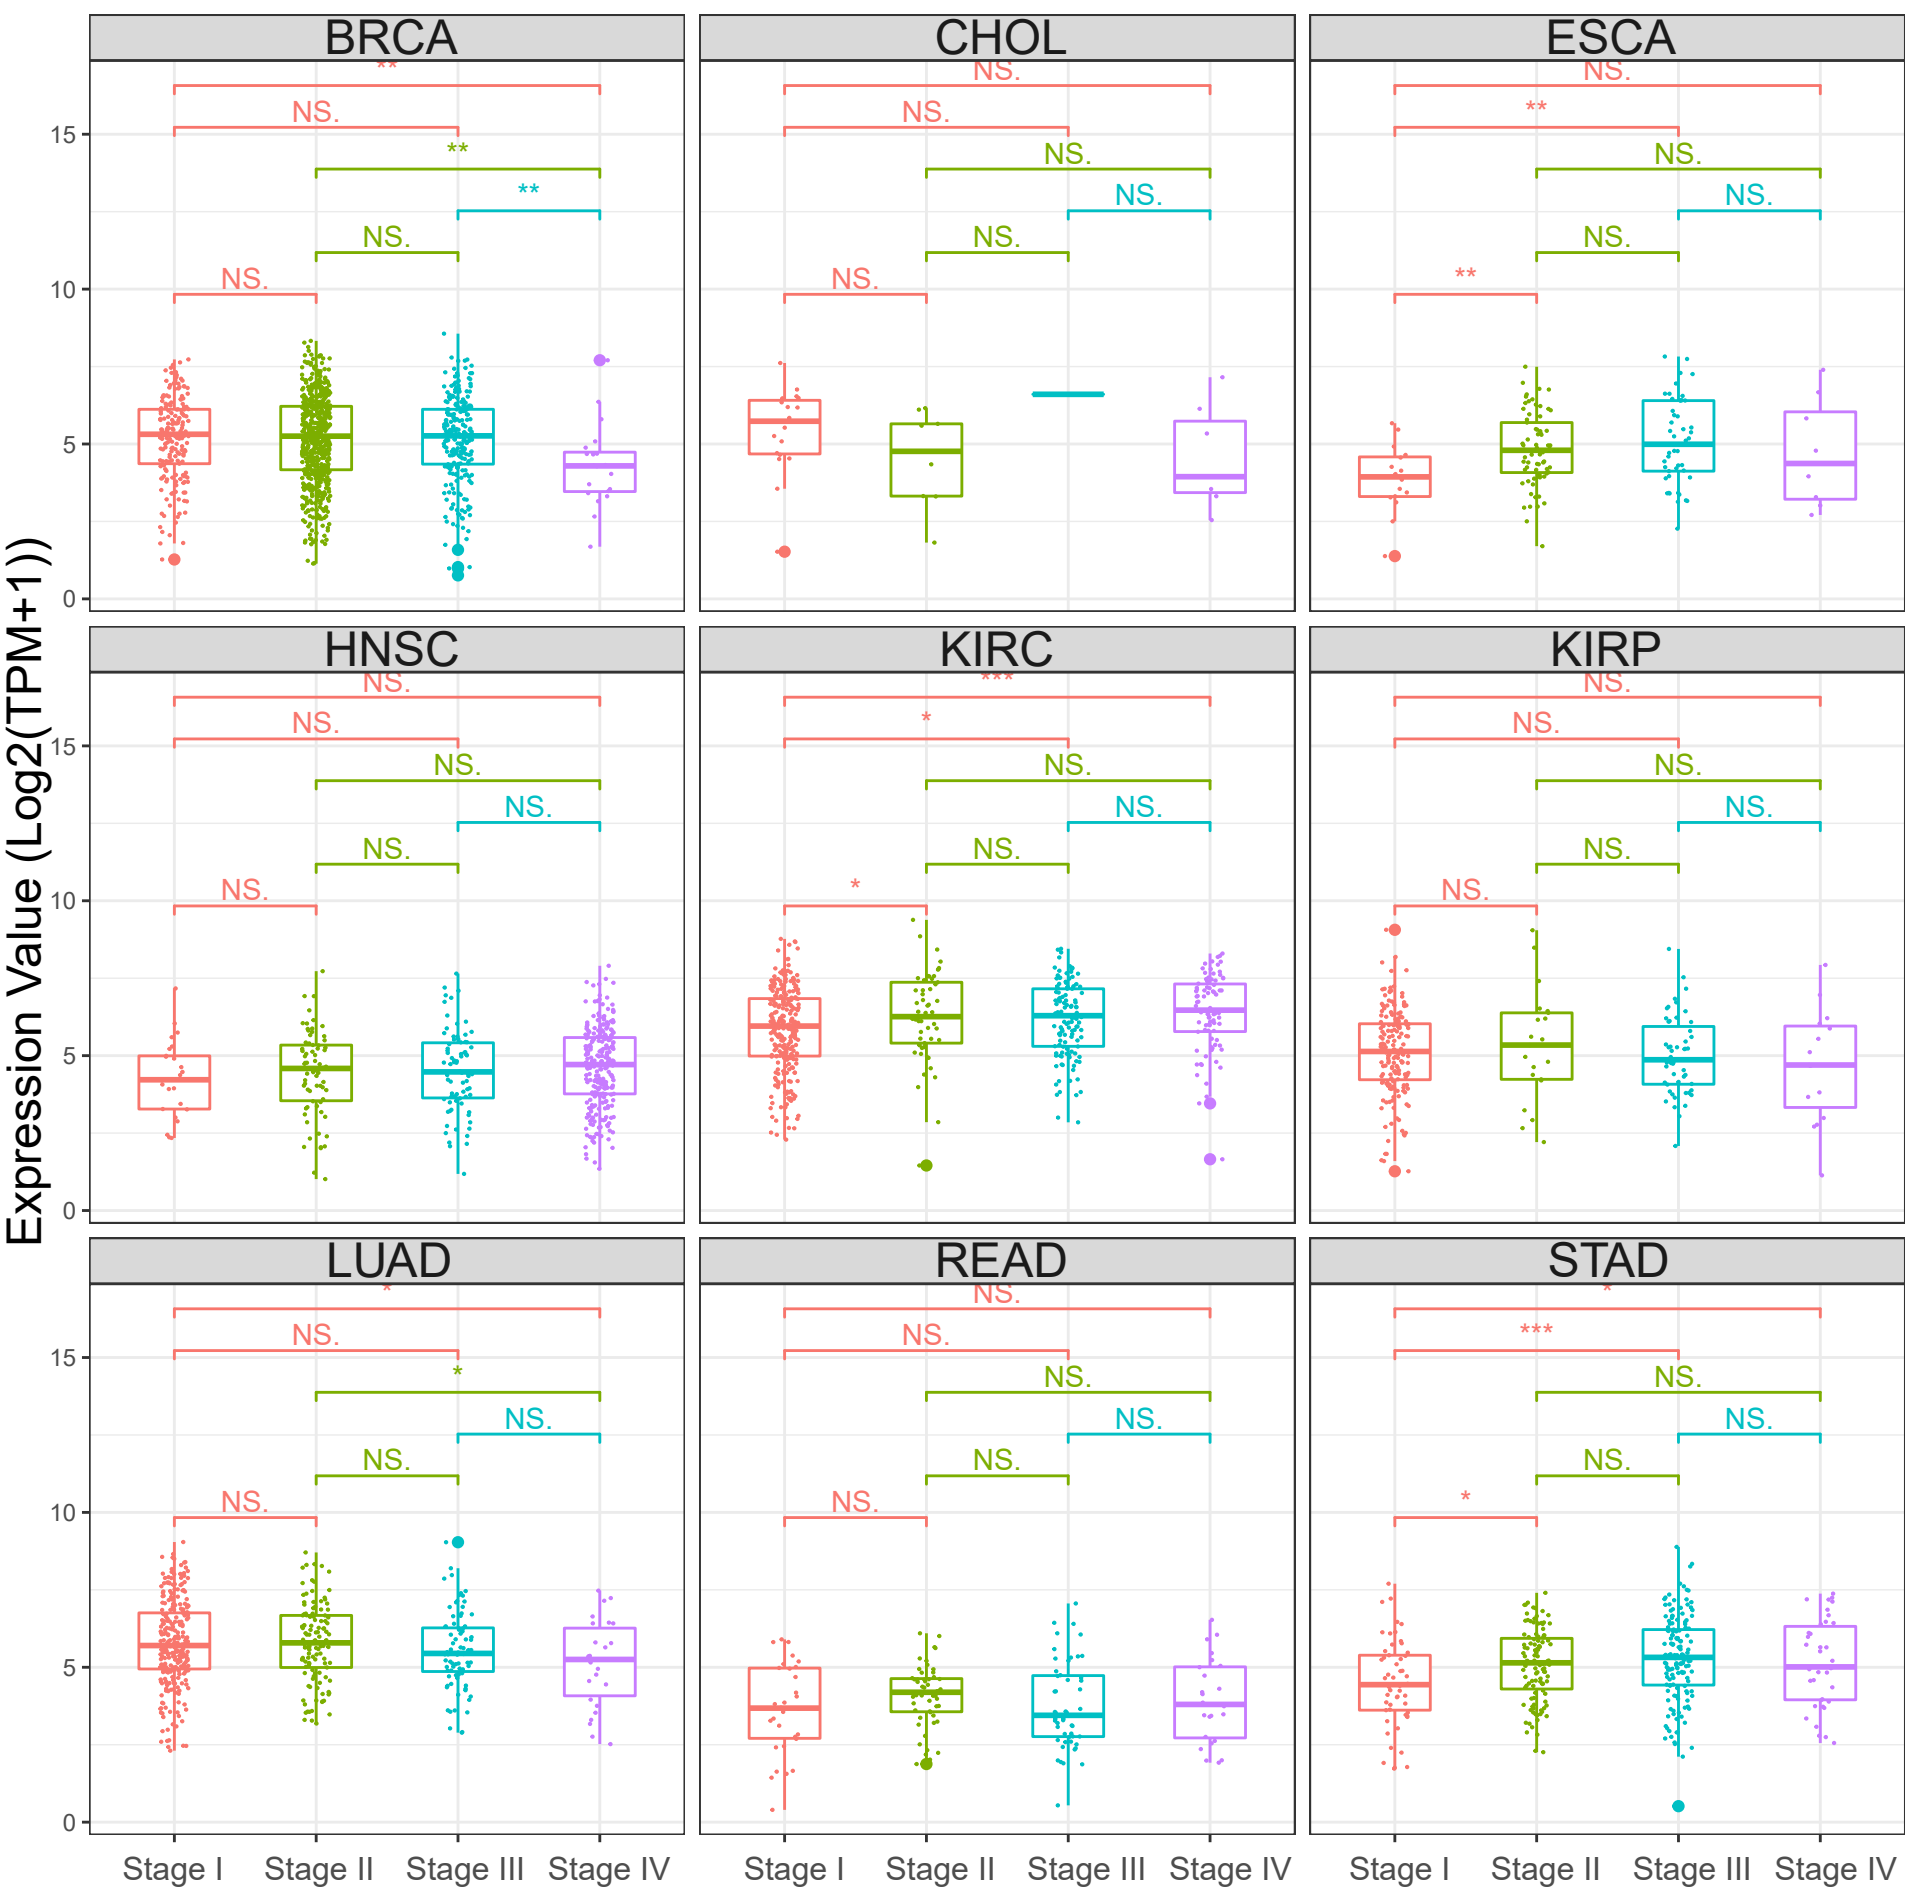

Supplement: Image_3.PDF [file Image_3.PDF]
